# Supplementary material for: ATR Is a Therapeutic Target in Synovial Sarcoma
Source: Oxford University Press journal article supplement (doi:10.1158/0008-5472.can-17-2056), 2017-10-16
Supplement: 00085472can172056-sup-186092_2_supp_4299317_nx0198.docx [file 00085472can172056-sup-186092_2_supp_4299317_nx0198.docx]

Supplementary Table 4. SS-associated dependencies

| **GeneID** | **SS median Z-score** | **Panel Median Z-score** | **Wilcox p-value** | **Median difference** |
| --- | --- | --- | --- | --- |
| MDM2 | -3.22 | -0.13 | 0.018 | -3.09 |
| CALM1 | -2.43 | 0.04 | 0.023 | -2.47 |
| RHOH | -2.16 | 0.02 | 0.032 | -2.18 |
| MAP3K11 | -2.3 | -0.25 | 0.015 | -2.05 |
| DYRK1A | -1.8 | 0.17 | 0.001 | -1.97 |
| GRK6 | -1.57 | 0.265 | 0.001 | -1.835 |
| APCDD1 | -2.49 | -0.75 | 0.013 | -1.74 |
| ILK | -2.08 | -0.375 | 0.003 | -1.705 |
| RFP | -1.81 | -0.11 | 0.007 | -1.7 |
| SLK | -1.21 | 0.325 | 0.002 | -1.535 |
| SFRP5 | -1.32 | 0.19 | 0.028 | -1.51 |
| PIP5KL1 | -1.19 | 0.285 | 0.014 | -1.475 |
| MARK4 | -2.12 | -0.66 | 0.002 | -1.46 |
| PFKFB2 | -1.14 | 0.235 | 0.003 | -1.375 |
| BRCA1 | -1.75 | -0.43 | 0.003 | -1.32 |
| FOXN1 | -1.17 | 0.085 | 0.040 | -1.255 |
| PLK2 | -1.09 | 0.16 | 0.005 | -1.25 |
| ARID2 | -1.32 | -0.08 | 0.023 | -1.24 |
| MYO3B | -0.68 | 0.51 | 0.013 | -1.19 |
| ERCC3 | -1.16 | 0.03 | 0.013 | -1.19 |
| ZBTB16 | -2.27 | -1.08 | 0.041 | -1.19 |
| RAD9A | -1.04 | 0.13 | 0.018 | -1.17 |
| N4BP2 | -0.56 | 0.575 | 0.004 | -1.135 |
| MAPKAPK5 | -1.18 | -0.05 | 0.024 | -1.13 |
| CDH1 | -0.46 | 0.65 | 0.019 | -1.11 |
| REV1 | -1.15 | -0.05 | 0.022 | -1.1 |
| TEK | -0.48 | 0.615 | 0.013 | -1.095 |
| EPHB1 | -1.1 | -0.05 | 0.023 | -1.05 |
| FANCA | -1.76 | -0.71 | 0.028 | -1.05 |
| LIMK2 | -0.68 | 0.37 | 0.049 | -1.05 |
| FLJ13052 | -0.83 | 0.21 | 0.012 | -1.04 |
| NEK2 | -1.44 | -0.435 | 0.006 | -1.005 |
| WNT7B | -1.71 | -0.72 | 0.040 | -0.99 |
| MVK | -0.94 | 0.02 | 0.005 | -0.96 |
| HSMDPKIN | -0.69 | 0.245 | 0.015 | -0.935 |
| ANKK1 | -0.78 | 0.15 | 0.003 | -0.93 |
| PFKL | -0.78 | 0.15 | 0.012 | -0.93 |
| PHKA2 | -0.95 | -0.05 | 0.008 | -0.9 |
| EME2 | -0.96 | -0.09 | 0.040 | -0.87 |
| RAD18 | -0.36 | 0.51 | 0.050 | -0.87 |
| LYK5 | -1.16 | -0.3 | 0.014 | -0.86 |
| ERCC3 | -0.94 | -0.09 | 0.002 | -0.85 |
| BRCA2 | -0.96 | -0.11 | 0.015 | -0.85 |
| P2RY8 | -0.68 | 0.17 | 0.037 | -0.85 |
| PRKX | -0.68 | 0.165 | 0.028 | -0.845 |
| COPEB | -0.67 | 0.17 | 0.014 | -0.84 |
| LEF1 | -0.35 | 0.475 | 0.037 | -0.825 |
| NEK4 | -0.79 | 0.025 | 0.041 | -0.815 |
| STK29 | -0.26 | 0.55 | 0.009 | -0.81 |
| AKAP9 | -0.9 | -0.1 | 0.037 | -0.8 |
| NEK1 | -0.68 | 0.115 | 0.011 | -0.795 |
| ATR | -1.33 | -0.54 | 0.022 | -0.79 |
| NRBP | -1.21 | -0.44 | 0.018 | -0.77 |
| BRCA2 | -0.94 | -0.19 | 0.030 | -0.75 |
| AES | 0.34 | 1.065 | 0.040 | -0.725 |
| FER | -0.49 | 0.23 | 0.010 | -0.72 |
| CHKB | 0.06 | 0.76 | 0.050 | -0.7 |
| PKMYT1 | -0.7 | -0.02 | 0.026 | -0.68 |
| SMO | 0.07 | 0.75 | 0.029 | -0.68 |
| FYN | -0.33 | 0.345 | 0.012 | -0.675 |
| MYCBP | -0.23 | 0.44 | 0.032 | -0.67 |
| TK2 | -0.3 | 0.355 | 0.018 | -0.655 |
| RPTOR | -0.42 | 0.22 | 0.013 | -0.64 |

Supplementary Table 4 - *continued*

| **GeneID** | **SS median Z-score** | **Panel Median Z-score** | **Wilcox p-value** | **Median difference** |
| --- | --- | --- | --- | --- |
| ECT2L | -0.91 | -0.27 | 0.039 | -0.64 |
| ACVR1C | -0.09 | 0.535 | 0.042 | -0.625 |
| DLG3 | -0.08 | 0.54 | 0.017 | -0.62 |
| SH3BP2 | 0.17 | 0.79 | 0.019 | -0.62 |
| PRKX | -0.01 | 0.59 | 0.017 | -0.6 |
| ZNF521 | -0.86 | -0.28 | 0.033 | -0.58 |
| BCL9L | -0.87 | -0.295 | 0.028 | -0.575 |
| KIAA1804 | 0.23 | 0.79 | 0.039 | -0.56 |
| MAP3K12 | -0.54 | 0 | 0.007 | -0.54 |
| GTF2H2 | -0.3 | 0.22 | 0.015 | -0.52 |
| DDR2 | -0.11 | 0.395 | 0.027 | -0.505 |
| GUCY2EP | -0.24 | 0.25 | 0.041 | -0.49 |
| NME2 | 0 | 0.45 | 0.011 | -0.45 |
| NME5 | 0.68 | 1.04 | 0.036 | -0.36 |
| ARHGAP4 | 0.18 | 0.525 | 0.032 | -0.345 |
| CCND3 | -0.28 | 0.01 | 0.050 | -0.29 |
| BMPR1B | 0.23 | 0.48 | 0.050 | -0.25 |
| SRGAP3 | 0.35 | 0.57 | 0.015 | -0.22 |
