# Supplementary material for: ATR Is a Therapeutic Target in Synovial Sarcoma
Source: Oxford University Press journal article supplement (doi:10.1158/0008-5472.can-17-2056), 2017-10-16
Supplement: 00085472can172056-sup-186092_2_supp_4299319_cx0198.docx [file 00085472can172056-sup-186092_2_supp_4299319_cx0198.docx]

Supplementary Table 5. VX970 resistance siRNAs

|  | **Z-score** | | |  |  | **Z-score** | | |
| --- | --- | --- | --- | --- | --- | --- | --- | --- |
| **GeneID** | **DMSO** | **VX970** | **DE** |  | **GeneID** | **DMSO** | **VX970** | **DE** |
| CCNE1 | -0.76 | 9.38 | 7.70 |  | AAK1 | -0.81 | 3.07 | 2.81 |
| PIP5K1A | -1.37 | 6.45 | 5.82 |  | DDX10 | -2.51 | 1.56 | 2.79 |
| CBLC | -2.34 | 4.66 | 5.09 |  | MYF5 | -2.97 | 1.15 | 2.78 |
| BCL9L | -2.40 | 4.21 | 4.78 |  | MAP3K1 | -2.47 | 1.57 | 2.77 |
| CCND2 | -1.17 | 5.10 | 4.64 |  | GTF2H2 | -1.88 | 2.05 | 2.74 |
| NTHL1 | -2.47 | 3.94 | 4.62 |  | HOXC13 | -1.43 | 2.43 | 2.73 |
| PYCS | -1.68 | 4.42 | 4.45 |  | TCF7 | -1.25 | 2.59 | 2.73 |
| GNAQ | -2.65 | 3.53 | 4.42 |  | EFNB3 | 0.05 | 3.68 | 2.69 |
| GNAS | -2.72 | 3.07 | 4.11 |  | PRKAB1 | -0.27 | 3.37 | 2.67 |
| MAP4K4 | -0.76 | 4.76 | 4.09 |  | PITX2 | -1.74 | 2.06 | 2.65 |
| P2RY8 | -2.21 | 3.48 | 4.08 |  | SMARCA4 | -1.51 | 2.22 | 2.62 |
| FER | -1.37 | 4.14 | 4.02 |  | INSRR | -1.57 | 2.16 | 2.62 |
| BRIP1 | -2.54 | 3.05 | 3.97 |  | SLK | -1.50 | 2.23 | 2.62 |
| SLC45A3 | -2.54 | 3.01 | 3.95 |  | PRKD2 | -0.40 | 3.19 | 2.61 |
| PRKAR1B | -2.19 | 3.27 | 3.90 |  | SETBP1 | -0.24 | 3.23 | 2.54 |
| ILK | -2.75 | 2.77 | 3.89 |  | PAK4 | -0.73 | 2.79 | 2.54 |
| CDC2 | -1.81 | 3.54 | 3.86 |  | RAD51D | -1.31 | 2.28 | 2.53 |
| LIG4 | -2.60 | 2.75 | 3.78 |  | IKBKE | 1.08 | 4.36 | 2.52 |
| AK5 | -1.29 | 3.88 | 3.76 |  | SSTK | -2.44 | 1.28 | 2.52 |
| BRIP1 | -2.10 | 3.15 | 3.75 |  | TCF12 | -1.20 | 2.36 | 2.52 |
| PIP5K1B | -2.97 | 2.24 | 3.64 |  | PINK1 | -1.73 | 1.90 | 2.52 |
| CREBBP | -2.85 | 2.29 | 3.59 |  | CCND1 | 1.04 | 4.26 | 2.47 |
| CALM1 | -2.14 | 2.90 | 3.58 |  | DKK4 | -1.52 | 2.00 | 2.46 |
| CK2A | -0.85 | 4.01 | 3.56 |  | PRPS1L1 | 0.36 | 3.62 | 2.43 |
| MAP3K9 | -2.37 | 2.61 | 3.51 |  | CLK4 | -1.67 | 1.83 | 2.42 |
| TEX14 | -2.36 | 2.61 | 3.51 |  | RARA | -1.22 | 2.17 | 2.38 |
| ZBTB33 | -1.59 | 3.27 | 3.49 |  | RNF146 | -2.35 | 1.18 | 2.38 |
| PIK3C2B | -0.91 | 3.67 | 3.34 |  | PPA1 | -2.01 | 1.47 | 2.37 |
| ADP-GK | -0.62 | 3.91 | 3.33 |  | PRKAG2 | -1.33 | 2.05 | 2.36 |
| CREB3L1 | -2.90 | 1.76 | 3.21 |  | SEPT5 | -2.26 | 1.23 | 2.36 |
| TNK2 | -0.27 | 4.05 | 3.20 |  | HRAS | -2.44 | 1.07 | 2.36 |
| CALM1 | -2.44 | 2.14 | 3.19 |  | MAST2 | -2.33 | 1.16 | 2.35 |
| CLDN1 | -2.69 | 1.92 | 3.19 |  | GRK7 | -1.50 | 1.84 | 2.32 |
| PML | -1.08 | 3.30 | 3.17 |  | NUTM2A | -2.70 | 0.78 | 2.31 |
| NME1 | -0.72 | 3.53 | 3.10 |  | PKN3 | -1.27 | 2.00 | 2.29 |
| STAT5B | -0.91 | 3.36 | 3.10 |  | CDK2 | -1.00 | 2.23 | 2.29 |
| PAK1 | -2.71 | 1.75 | 3.07 |  | SOCS1 | -2.98 | 0.43 | 2.23 |
| PRKAB1 | 0.61 | 4.56 | 3.00 |  | NFATC1 | -0.24 | 2.78 | 2.19 |
| CKS1B | -1.06 | 3.05 | 2.96 |  | FRAP1 | -1.63 | 1.56 | 2.19 |
| PRKAG3 | -0.10 | 3.89 | 2.96 |  | MAPK1 | -2.26 | 0.96 | 2.15 |
| BRD4 | -2.78 | 1.54 | 2.96 |  | CAMK1 | -0.64 | 2.33 | 2.11 |
| NDP | -2.89 | 1.43 | 2.94 |  | RHOH | -1.99 | 1.12 | 2.09 |
| FANCE | -1.53 | 2.55 | 2.89 |  | NFKB2 | -1.45 | 1.58 | 2.08 |
| POLE | -2.66 | 1.53 | 2.86 |  | CLTC | -1.88 | 1.19 | 2.07 |
| POLB | 0.91 | 4.65 | 2.86 |  | ATM | 0.86 | 3.58 | 2.07 |
| MYCL | -0.95 | 3.01 | 2.85 |  | LCK | 0.12 | 2.90 | 2.04 |
| CAMK2G | -1.33 | 2.67 | 2.85 |  | YWHAE | -1.87 | 1.16 | 2.04 |
| ADCK5 | -1.78 | 2.27 | 2.85 |  | BMPR2 | -1.59 | 1.41 | 2.04 |
| ROR2 | -2.21 | 1.89 | 2.84 |  | TCF3 | -1.58 | 1.38 | 2.01 |
| CSNK1A1 | -1.22 | 2.75 | 2.84 |  | PNKP | -2.44 | 0.62 | 2.01 |
| SOX9 | -2.01 | 2.05 | 2.83 |  |  |  |  |  |
